# Supplementary material for: Interventions to Promote Patient Utilization of Cardiac Rehabilitation: Cochrane Systematic Review and Meta-Analysis
Source: J Clin Med. 2019 Feb 5;8(2):189. doi: 10.3390/jcm8020189 (PMC6406265; doi:10.3390/jcm8020189)
Supplement: Supplementary file 1 [file jcm-08-00189-s001.pdf]

# SUPPLEMENTAL MATERIAL

## Interventions to promote patient utilization of cardiac rehabilitation: Cochrane systematic review and meta-analysis

|     |                          |                                               |
|-----|--------------------------|-----------------------------------------------|
| p 2 | Supplemental<br>Table S1 | Excluded studies from previous review         |
| p 3 | Supplemental<br>Table S2 | Summary of characteristics of included trials |

**Supplemental Table S1:** Excluded studies from previous review

| Reference                                                                                                                                                                                                                                                                                         | Exclusion Reason                          |
|---------------------------------------------------------------------------------------------------------------------------------------------------------------------------------------------------------------------------------------------------------------------------------------------------|-------------------------------------------|
| Arrigo, I.; Brunner-LaRocca, H.; Lefkovits, M.; Pfisterer, M.; Hoffmann, A. Comparative outcome one year after formal cardiac rehabilitation: the effects of a randomized intervention to improve exercise adherence. <i>Eur. J. Cardiovasc. Prev. Rehabil.</i> <b>2008</b> , <i>15</i> , 306–11. | Wrong intervention and outcomes           |
| Daltroy, L. Improving cardiac patient adherence to exercise regimens: a clinical trial of health education. <i>J. Card. Rehabil.</i> <b>1985</b> , <i>5</i> , 40–49.                                                                                                                              | Not comprehensive CR (i.e. exercise only) |
| Duncan, K.; Pozehl, B. Effects of an exercise adherence intervention on outcomes in patients with heart failure. <i>Rehabil. Nurs.</i> <b>2003</b> , <i>28</i> , 117–122.                                                                                                                         | Not comprehensive CR                      |
| Hillebrand, T.; Frodermann, H.; Lehr, D.; Wirth, A. Increased participation in coronary groups by means of an outpatient care program. <i>Herz Kreislauf</i> <b>1995</b> , <i>27</i> , 346–349.                                                                                                   | Intervention delivered after CR           |
| Izawa, K.P.; Watanabe, S.; Omiya, K.; Hirano, Y.; Oka, K.; Osada, N.; Iijima, S. Effect of the Self-Monitoring Approach on Exercise Maintenance During Cardiac Rehabilitation. <i>Am. J. Phys. Med. Rehabil.</i> <b>2005</b> , <i>84</i> , 313–321.                                               | Intervention delivered after CR           |
| Moore, S.M.; Charvat, J.M.; Gordon, N.H.; Pashkow, F.; Ribisl, P.; Roberts, B.L.; Rocco, M. Effects of a CHANGE intervention to increase exercise maintenance following cardiac events. <i>Ann. Behav. Med.</i> <b>2006</b> , <i>31</i> , 53–62.                                                  | Intervention delivered after CR           |
| Sniehotta, F.F.; Scholz, U.; Schwarzer, R. Action plans and coping plans for physical exercise: A longitudinal intervention study in cardiac rehabilitation. <i>Br. J. Health Psychol.</i> <b>2006</b> , <i>11</i> , 23–37.                                                                       | Not comprehensive CR (i.e. exercise only) |

**Supplemental Table S2: - Summary of Characteristics of Included Trials**

|                                                                   | <b>n (%) or mean <math>\pm</math> standard deviation (median)</b> |
|-------------------------------------------------------------------|-------------------------------------------------------------------|
| <b><u>Study characteristics</u></b>                               |                                                                   |
| <b>Publication year</b>                                           | 2009.9 $\pm$ 7.7 (2012.5)                                         |
| <b>Study region</b>                                               |                                                                   |
| North America                                                     | 16 (61.5%)                                                        |
| Europe                                                            | 3 (11.5%)                                                         |
| Other                                                             | 7 (27.0%)                                                         |
| <b>Multi-centre</b>                                               | 14 (53.8%)                                                        |
| <b>Parallel-group design</b>                                      | 25 (96.1%)                                                        |
| <b>Sample Size</b>                                                | 193.1 $\pm$ 173.1 (135)                                           |
| <b>Outcome ascertainment</b>                                      |                                                                   |
| Chart                                                             | 13 (50.0%)                                                        |
| Self-report                                                       | 4 (15.4%)                                                         |
| Unclear                                                           | 9 (34.6%)                                                         |
| <b><u>Cardiac Rehabilitation (CR) Program Characteristics</u></b> |                                                                   |
| <b>Program Duration (weeks)</b>                                   | 12.8 $\pm$ 4.6 (n=10, 38.5% $\geq$ 3months)                       |
| <b>Women-only</b>                                                 | 3 (11.5%)                                                         |
| <b>Some unsupervised</b>                                          | 8 (30.8%)                                                         |
| <b><u>Patient characteristics</u></b>                             |                                                                   |
| <b>Sex</b>                                                        |                                                                   |
| Males only                                                        | 1 (3.9%)                                                          |
| Women only                                                        | 3 (11.5%)                                                         |
| Mixed-sex                                                         | 22 (84.6%)                                                        |
| <b>Age (years)</b>                                                | 63.4 $\pm$ 10.4 (median 63.4)                                     |

|                                            |             |
|--------------------------------------------|-------------|
| <b>Diagnosis</b>                           |             |
| Any heart failure                          | 10 (38.4%)  |
| <b><u>Intervention Characteristics</u></b> |             |
| <b>Delivered by healthcare provider</b>    | 8 (30.7%)   |
| <b>Some face-to-face</b>                   | 14 (53.8%)  |
| <b>Number of contacts</b>                  | 12.7 ± 32.0 |
| <b>Delivered Pre-CR</b>                    | 13 (50.0%)  |
| <b>Target – Patient</b>                    | 23 (88.5%)  |
